# Supplementary material for: Hypoxia-induced TET1 facilitates trophoblast cell migration and invasion through HIF1α signaling pathway
Source: PubMed Central journal article supplement (PMC5556046; doi:10.1038/s41598-017-07560-7), 2017-08-14

**Hypoxia-induced TET1 facilitates trophoblast cell migration and invasion  
through HIF1 $\alpha$  signaling pathway**

**Jingping Zhu<sup>1</sup>, Kai Wang<sup>1</sup>, Ting Li<sup>2</sup>, Jiayu Chen<sup>1</sup>, Dandan Xie<sup>1</sup>, Xinwen Chang<sup>1</sup>,  
Julei Yao<sup>1</sup>, Jinting Wu<sup>1</sup>, Qian Zhou<sup>1</sup>, Yuanhui Jia<sup>1\*</sup> & Tao Duan<sup>2\*</sup>**

1 Clinical and Translational Research Center, Shanghai First Maternity and Infant Hospital, Tongji University School of Medicine, Shanghai, 200040, China.

2 Department of Obstetrics, Shanghai First Maternity and Infant Hospital, Tongji University School of Medicine, Shanghai, 201204, China.

\*corresponding authors: Y.J. (email: yuanhui.jia@163.com) & T.D. (email: tduan@yahoo.com)

**Table1: Sequence of the primers for real-time qPCR.**

| Target        | Sequence (5' → 3')                                      |
|---------------|---------------------------------------------------------|
| 18S           | F:GGCGGCGTTATTCCCATGA<br>R:GAGGTTTCCCGTGTTGAG           |
| TET1          | F:GAAAGAAGAGGGCTGCGATG<br>R:TGCACGGTCTCAGTGTTACT        |
| TET2          | F:ACAGAAGCAAGAACAGCAGC<br>R:AGCTTGCAGGTGGATTCTCT        |
| HIF1 $\alpha$ | F: GAACGTCGAAAAGAAAAGTCTCG<br>R:CCTTATCAAGATGCGAACTCACA |
| HIF2 $\alpha$ | F:CGGAGGTGTTCTATGAGCTGG<br>R:AGCTTGTGTGTTTCGCAGGAA      |
| PGK1          | F:TGGACGTTAAAGGGAAGCGG<br>R:GCTCATAAGGACTACCGACTTGG     |
| LDHA          | F:ATGGCAACTCTAAAGGATCAGC<br>R:CCAACCCAACAACCTGTAATCT    |
| BNIP3         | F:CCTTCCAATCTCTGCTGCTCT<br>R:TCCACTAACGAACCAAGTCAG      |
| ENO1          | F:GTGTGGCTCTAACCCTCTGG<br>R:GGACCTTCTGTGGGACCTCT        |

**Table2: List of antibodies used in the western blot.**

| Protein           | Origin                 | Dilution | Incubation period |
|-------------------|------------------------|----------|-------------------|
| $\alpha$ -Tubulin | GTX628802, Gene Tex.   | 1:1,000  | 4 °C, overnight   |
| HIF1 $\alpha$     | #3716, CST.            | 1:1,000  | 4 °C, overnight   |
| HIF2 $\alpha$     | AF2997, R&D.           | 1:1,000  | 4 °C, overnight   |
| TET1              | GTX124207, Gene Tex    | 1:1,000  | 4 °C, overnight   |
| TET2              | Sc-136926, Santa Cruz. | 1:100    | 4 °C, overnight   |

**Figure-S1: The mRNA expression of HIF1 $\alpha$  was not regulated by TET1 by TET1 in cells exposed to 21% O<sub>2</sub>.** (A) The HIF1 $\alpha$  mRNA expression in shCtrl and shTET1 JEG3 cells exposed to 21% O<sub>2</sub>. (B) The HIF1 $\alpha$  mRNA expression in the negative control group and TET1 overexpression group of JEG3 cells exposed to 21% O<sub>2</sub>.

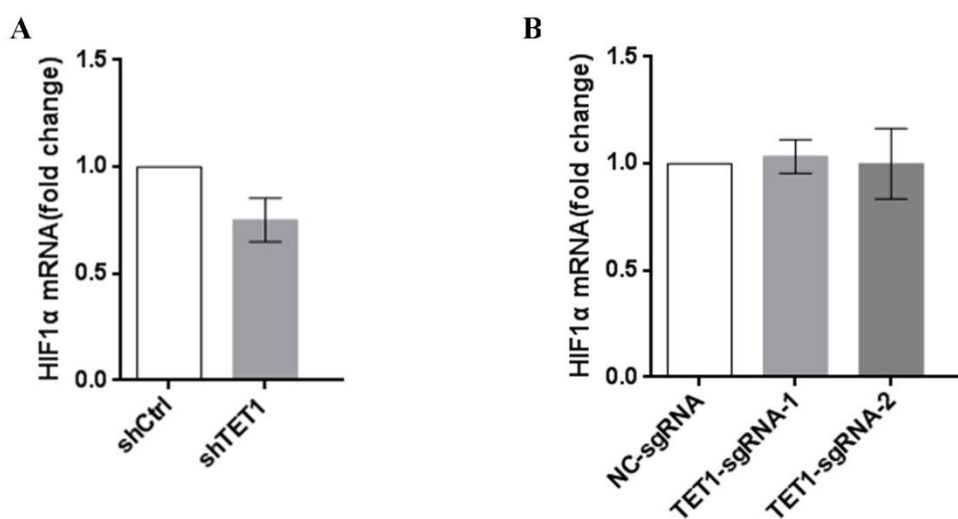

**Figure-S2: The DNA methyltransferases inhibitor (5-aza-Dc, AZA) abolished the TET1-knockdown mediated suppression of HIF1 $\alpha$  mRNA levels.** (A) The HIF1 $\alpha$  mRNA expression of JEG3 cells treated with different dose of AZA (0, 5, 10 and 20 $\mu$ M) for 72 hours. (\*P<0.05, one-way ANOVA) (B) The HIF1 $\alpha$  mRNA expression in shCtrl and shTET1 JEG3 cells treated with 20 $\mu$ M AZA for 72 hours.

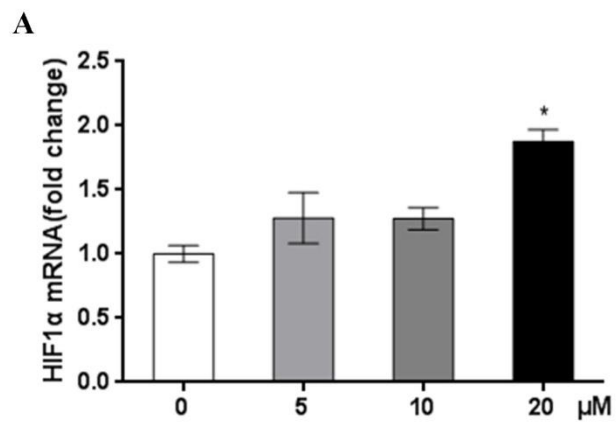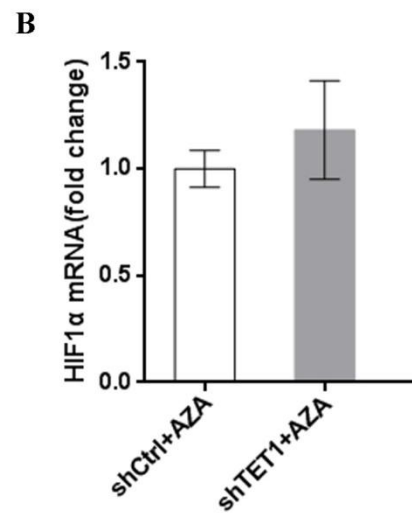

Supplement: 41598_2017_7560_MOESM1_ESM.pdf [file 41598_2017_7560_MOESM1_ESM.pdf]
